# Supplementary material
Source: publisher figshare collection journal article supplement (https://springernature.figshare.com/ndownloader/files/24127496)
Supplement: Supplementary file 1 [file 24127496]

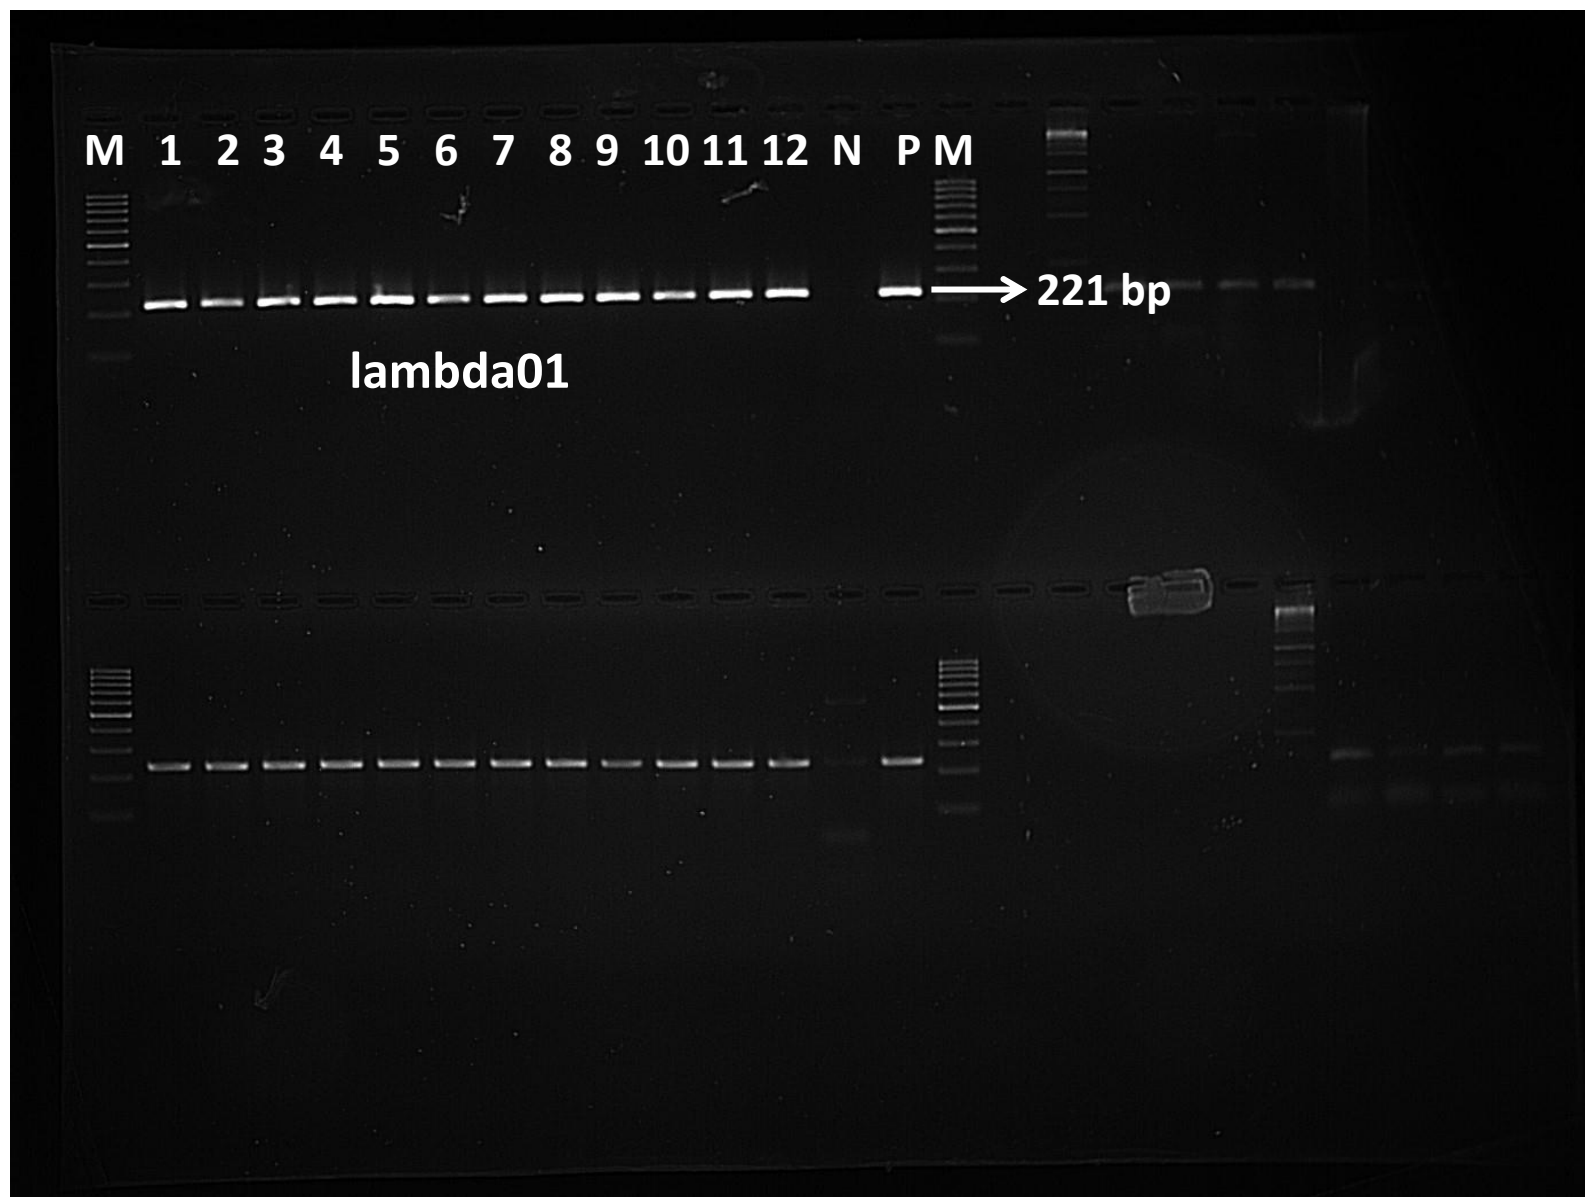

lambda01

221 bp

**Additional File 3A. PCR for the screening of *Bacillus anthracis* specific prophages in the 12 *B. anthracis* DFRL.BHE strains 1-12.**  
**(a) lambda01**

Lane 1-12, *B. anthracis* DFRL.BHE strains 1-12 along with positive (Lane P: *B. anthracis* BA10) and negative (Lane N: *B. cereus* ATCC 14579) controls. Lane M : 100 bp molecular marker.

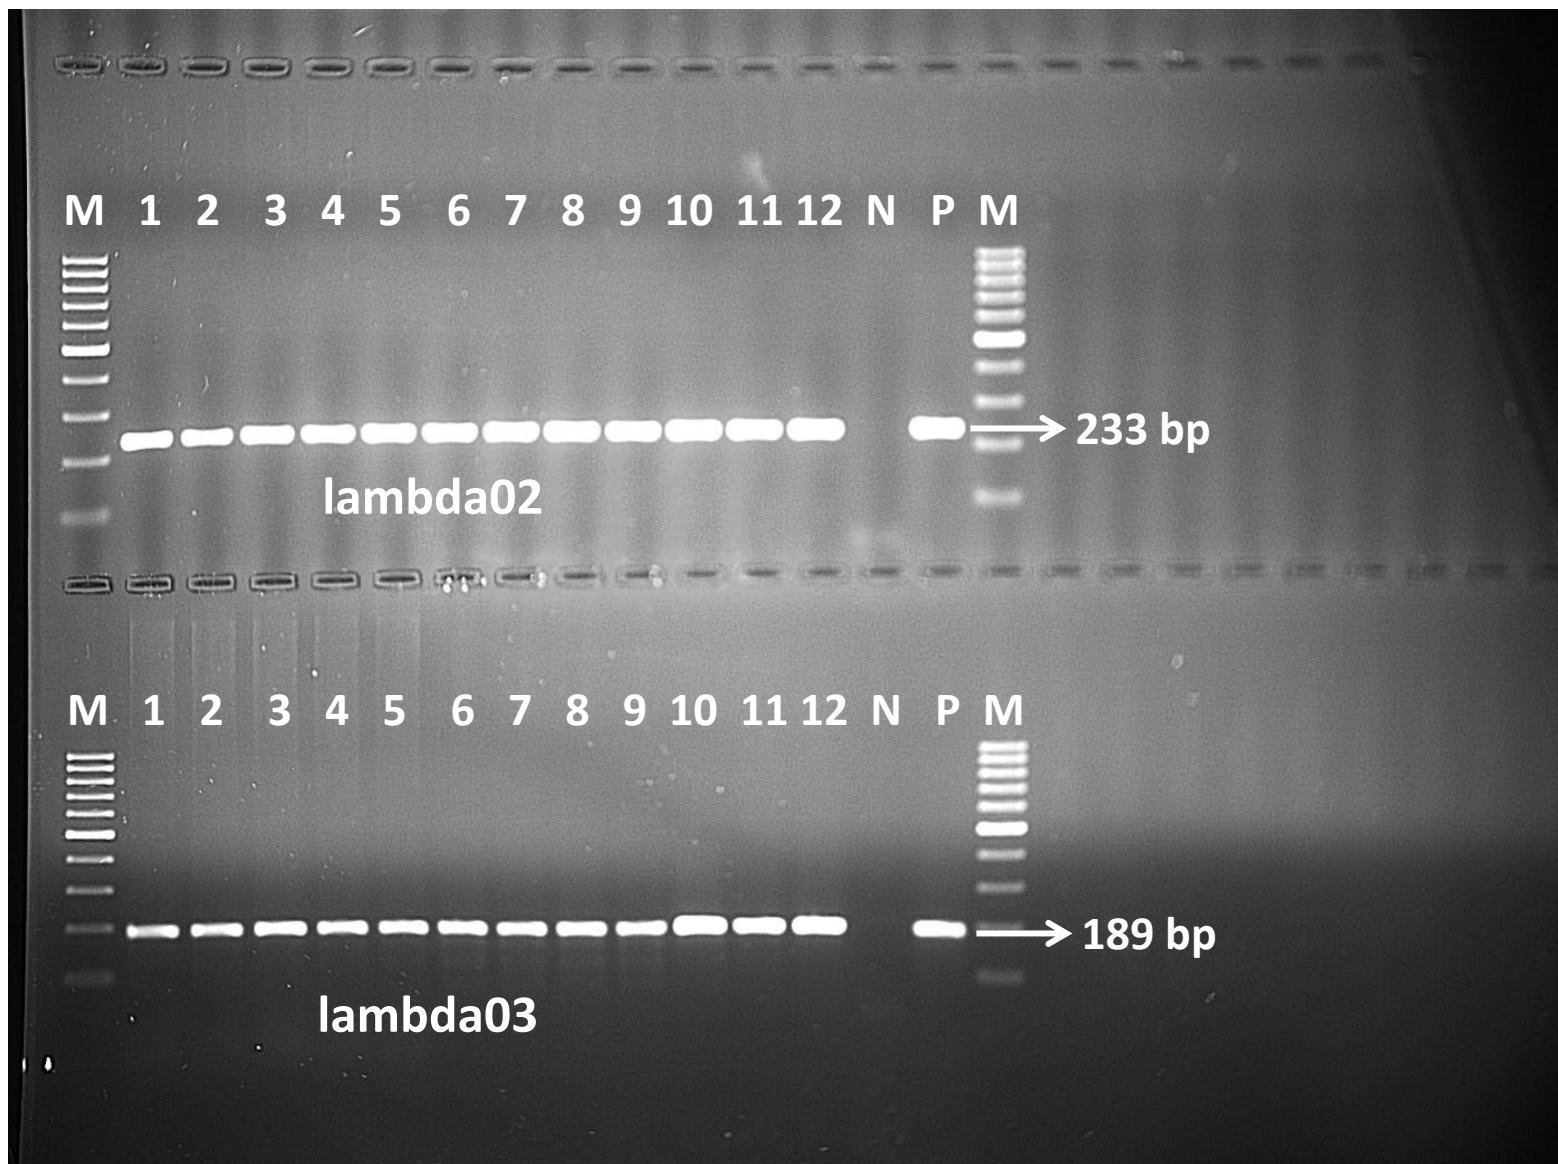

**Additional File 3A. PCR for the screening of *Bacillus anthracis* specific prophages in the 12 *B. anthracis* DFR.BHE strains 1-12.**  
**(b) lambda02 (c) lambda03**

Lane 1-12, *B. anthracis* DFR.BHE strains 1-12 along with positive (Lane P: *B. anthracis* BA10) and negative (Lane N: *B. cereus* ATCC 14579) controls. Lane M : 100 bp molecular marker.

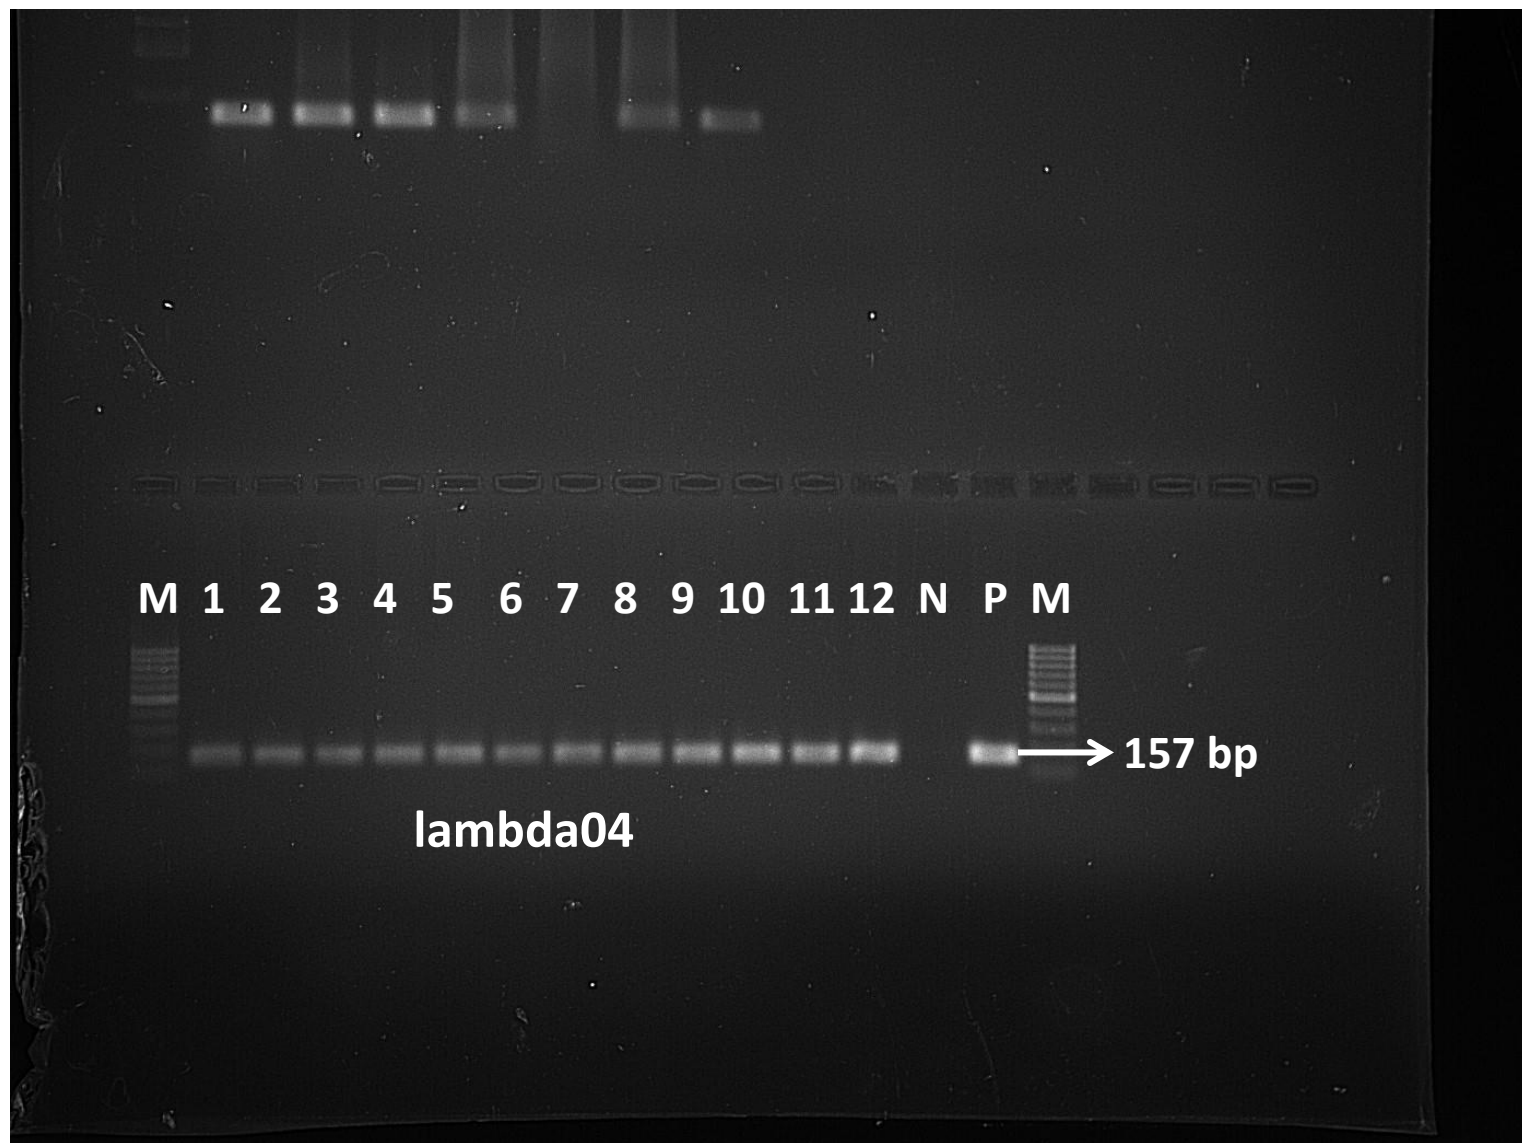

**Additional File 3A. PCR for the screening of *Bacillus anthracis* specific prophages in the 12 *B. anthracis* DFR.BHE strains 1-12. (d) lambda04**

Lane 1-12, *B. anthracis* DFR.BHE strains 1-12 along with positive (Lane P: *B. anthracis* BA10) and negative (Lane N: *B. cereus* ATCC 14579) controls. Lane M : 100 bp molecular marker.

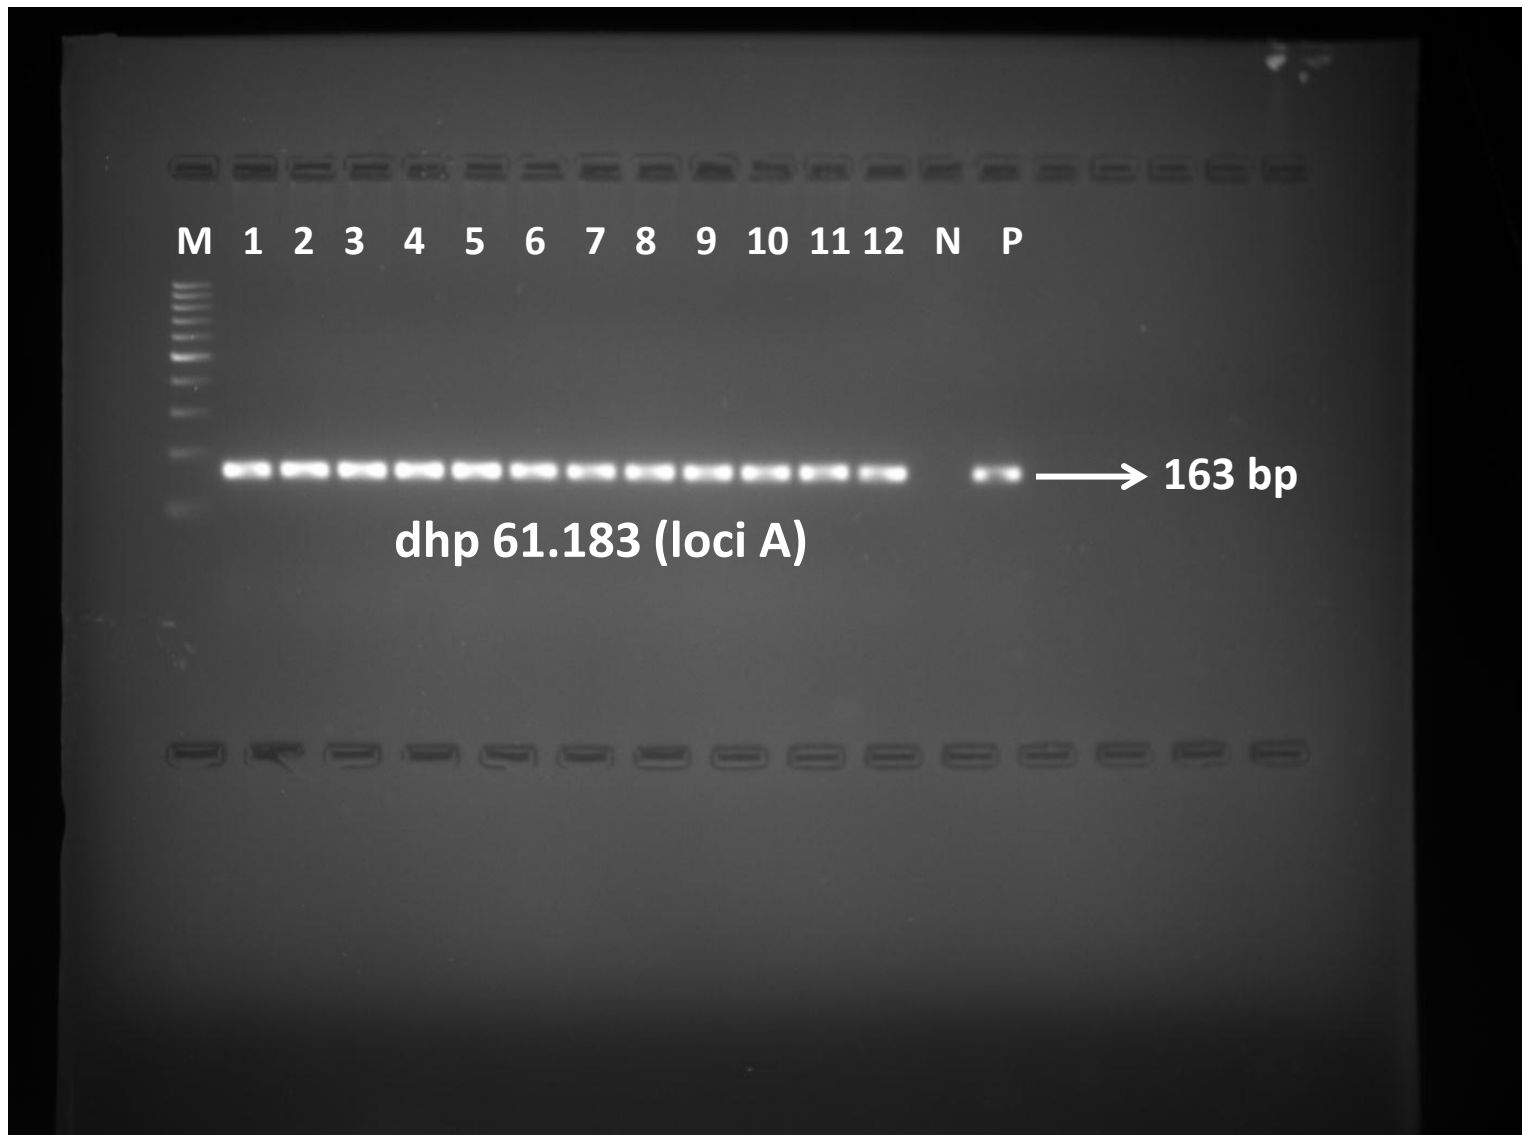

**Additional File 3B. PCR for the screening of *Bacillus anthracis* specific loci in the 12 *B. anthracis* DFR.BHE strains 1-12.**

**(a) dhp 61.183 (loci A)**

Lane 1-12, *B. anthracis* DFRL.BHE strains 1-12 along with positive (Lane P: *B. anthracis* BA10) and negative (Lane N: *B. cereus* ATCC 14579) controls. Lane M : 100 bp molecular marker.

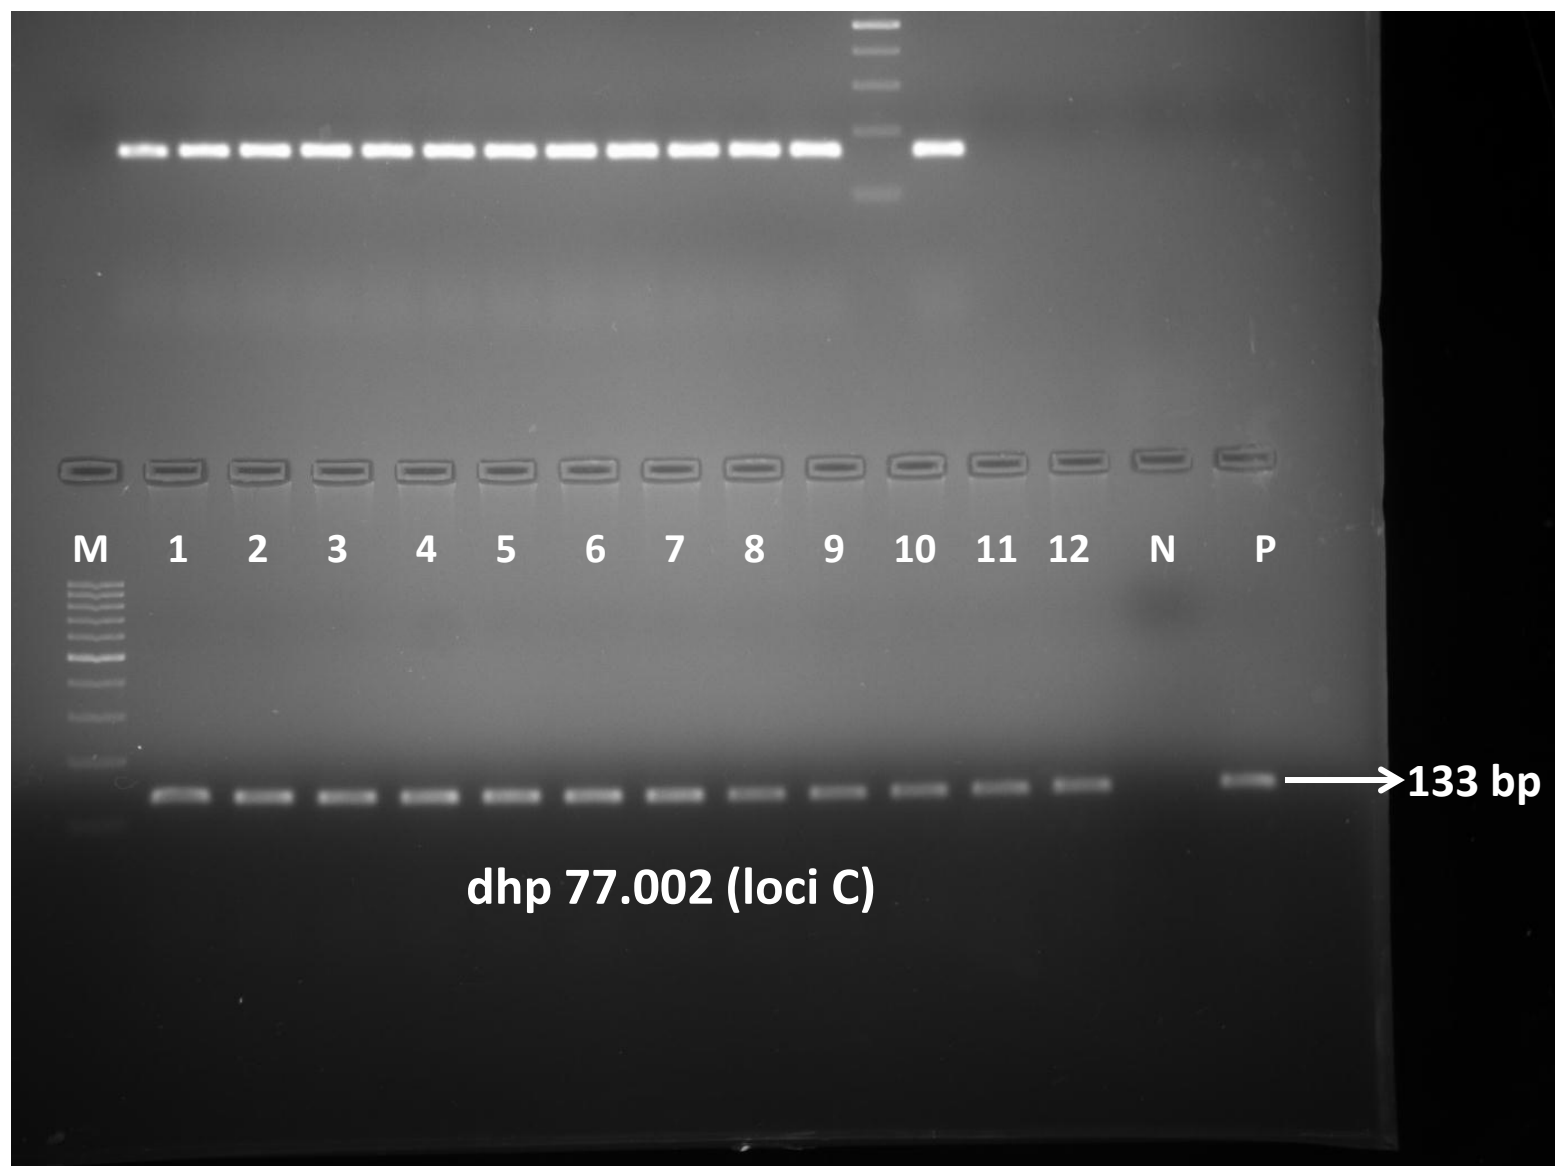

**Additional File 3B. PCR for the screening of *Bacillus anthracis* specific loci in the 12 *B. anthracis* DFR.BHE strains 1-12.**

**(b) dhps 77.002 (loci C)**

Lane 1-12, *B. anthracis* DFR.BHE strains 1-12 along with positive (Lane P: *B. anthracis* BA10) and negative (Lane N: *B. cereus* ATCC 14579) controls. Lane M : 100 bp molecular marker.

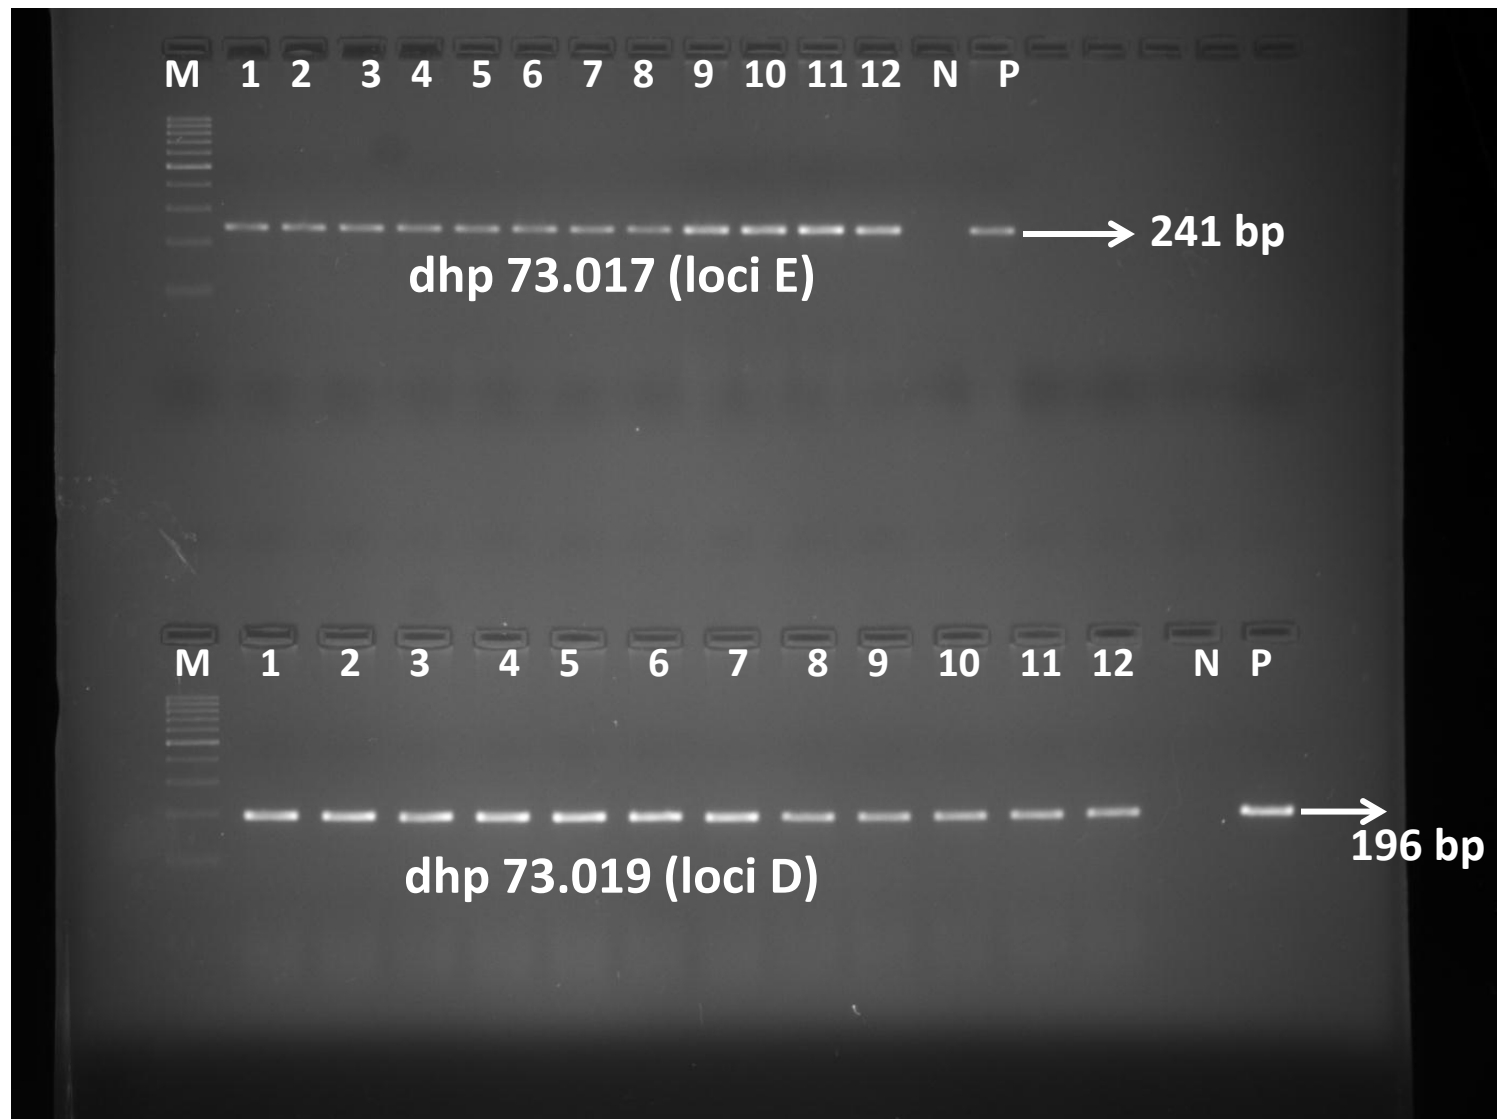

**Additional File 3B . PCR for the screening of *Bacillus anthracis* specific loci in the 12 *B. anthracis* DFR.BHE strains 1-12.**

**(d) dhps 73.017 (loci E), (c) dhps 73.019 (loci D),**

Lane 1-12, *B. anthracis* DFR.BHE strains 1-12 along with positive (Lane P: *B. anthracis* BA10) and negative (Lane N: *B. cereus* ATCC 14579) controls. Lane M : 100 bp molecular marker.
